# Supplementary material for: Climate Change Impacts Assessment Using Crop Simulation Model Intercomparison Approach in Northern Indo-Gangetic Basin of Bangladesh
Source: MDPI journal article supplement (doi:10.3390/ijerph192315829), 2022-11-28
Supplement: s1 [file s1]

## Supplementary File

**Title:** Climate change impacts assessment using crop simulation model intercomparison approach in northern Indo-Gangetic Basin of Bangladesh

Table S1. Soil properties of Amnura series input for DSSAT model

| Layer Depth (cm) | LL, Lower limit (cm <sup>3</sup> cm <sup>-3</sup> ) | DUL, Drained Upper limit (cm <sup>3</sup> cm <sup>-3</sup> ) | SAT, Upper limit sat. (cm <sup>3</sup> cm <sup>-3</sup> ) | RGF, Root Growth factor | BD, Bulk density (g cc <sup>-1</sup> ) | pH in water | CEC (cmol kg <sup>-1</sup> ) |
|------------------|-----------------------------------------------------|--------------------------------------------------------------|-----------------------------------------------------------|-------------------------|----------------------------------------|-------------|------------------------------|
| 10               | 0.118                                               | 0.289                                                        | 0.511                                                     | 1                       | 1.21                                   | 4.6         | 5.7                          |
| 15               | 0.105                                               | 0.261                                                        | 0.491                                                     | 1                       | 1.27                                   | 5.4         | 5.3                          |
| 27               | 0.141                                               | 0.293                                                        | 0.482                                                     | 0.657                   | 1.3                                    | 6           | 11.2                         |
| 48               | 0.127                                               | 0.283                                                        | 0.493                                                     | 0.472                   | 1.27                                   | 5.6         | 12.1                         |
| 76               | 0.152                                               | 0.31                                                         | 0.485                                                     | 0.289                   | 1.29                                   | 5.6         | 11.4                         |
| 99               | 0.188                                               | 0.352                                                        | 0.488                                                     | 0.174                   | 1.28                                   | 5.6         | 12.3                         |
| 132              | 0.178                                               | 0.341                                                        | 0.496                                                     | 0.099                   | 1.26                                   | 5.8         | 11.1                         |
| 165              | 0.152                                               | 0.32                                                         | 0.503                                                     | 0.051                   | 1.24                                   | 5.9         | 11.8                         |
| 190              | 0.159                                               | 0.315                                                        | 0.478                                                     | 0.029                   | 1.31                                   | 5.9         | 12.3                         |

LL- lower limit of plant extractable soil water, DUL- field capacity, SAT- saturated water content, CEC- cation exchange capacity

Table S2. Soil properties of Amnura series input for APSIM model

| Layer Depth (cm) | KS (mm/day) | BD (g/cc) | Airdry (mm/mm) | LL15 (mm/mm) | DUL (mm/mm) | SAT (mm/mm) |
|------------------|-------------|-----------|----------------|--------------|-------------|-------------|
| 0-10             | 10.000      | 1.210     | 0.114          | 0.118        | 0.289       | 0.511       |
| 10-15            | 5.000       | 1.270     | 0.182          | 0.105        | 0.261       | 0.491       |
| 15-25            | 24.000      | 1.300     | 0.228          | 0.141        | 0.293       | 0.482       |
| 25-45            | 24.000      | 1.270     | 0.228          | 0.127        | 0.283       | 0.493       |

KS- hydraulic conductivity of the soil at saturation

Table S3. Weather data input parameter for APSIM and DSSAT models

| Date       | Solar radiation | Max daily temperature | Min daily temperature | Precipitation | Dewpoint temperature | Average wind speed | Vapor pressure | Relative humidity |
|------------|-----------------|-----------------------|-----------------------|---------------|----------------------|--------------------|----------------|-------------------|
| yyyy-mm-dd | MJ/m2/d         | (°C)                  | (°C)                  | mm            | (°C)                 | m/s                | hPa            | %                 |
| W_DATE     | SRAD            | TMAX                  | TMIN                  | RAIN          | TDEW                 | WIND               | VPRSD          | RHUMD             |
| 2018-07-01 | 13.8            | 25.4                  | 12.6                  | 0             | 10.1                 | 0.5                | 12.4           | 36                |
| 2018-07-02 | 8.3             | 25.4                  | 12.7                  | 0             | 12.8                 | 0.4                | 14.8           | 43                |
| 2018-07-03 | 10.4            | 25.3                  | 12.6                  | 8.6           | 10.8                 | 0.5                | 13             | 38                |
| 2018-07-04 | 16.1            | 24.6                  | 12.8                  | 0             | 9.8                  | 1.2                | 12.2           | 37                |
| 2018-07-05 | 15              | 25.4                  | 12.6                  | 0             | 8.8                  | 1.7                | 11.4           | 33                |
| 2018-07-06 | 15.7            | 25.5                  | 12.6                  | 0             | 7.1                  | 1.5                | 10.1           | 29                |
| 2018-07-07 | 16.3            | 25.6                  | 12.7                  | 0             | 8.1                  | 1.6                | 10.8           | 31                |
| 2018-07-08 | 16.1            | 25.9                  | 12.9                  | 0             | 11.4                 | 1.4                | 13.5           | 38                |
| 2018-07-09 | 16.1            | 25.3                  | 13.1                  | 0             | 10.4                 | 1.2                | 12.7           | 37                |
| 2018-07-10 | 14.6            | 25.8                  | 12.7                  | 0             | 12.1                 | 1.4                | 14.1           | 40                |

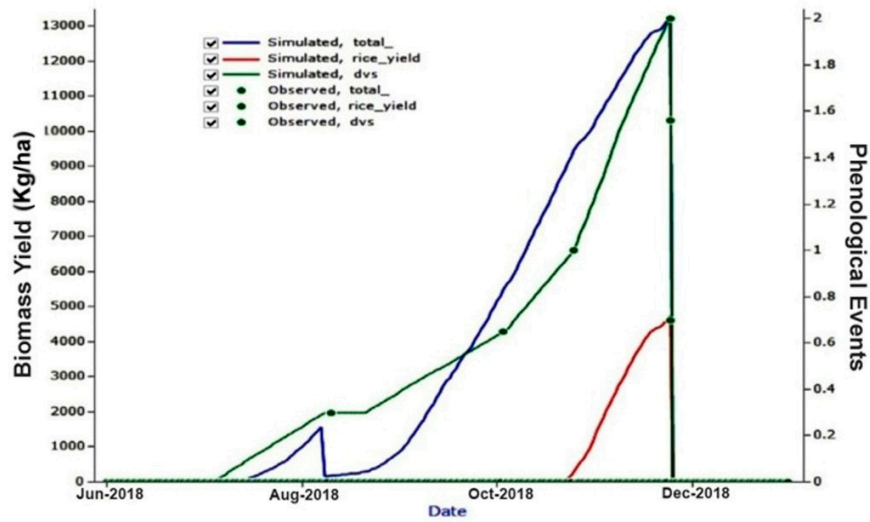

Figure S1. Calibration and validation output (observed and simulated) for the Rice cultivar (BR11- T. Aman) using APSIM-Rice model.

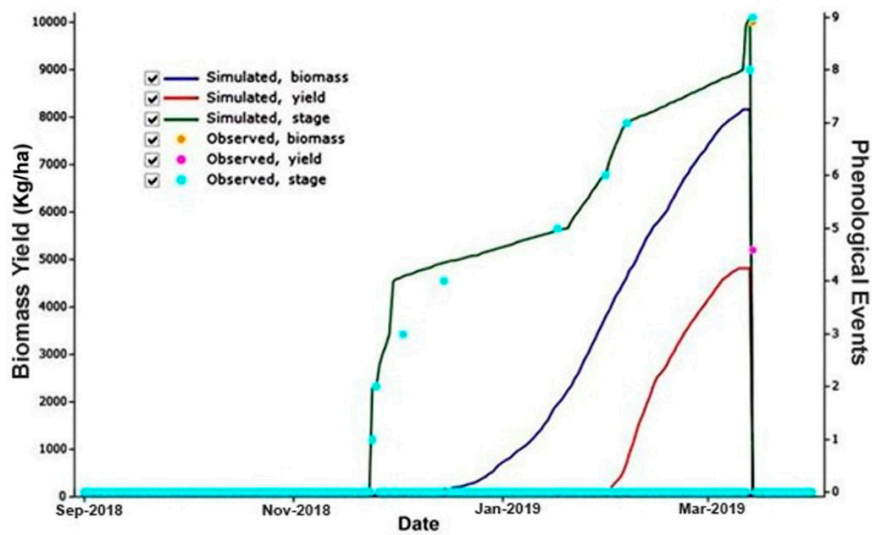

Figure S2. Calibration and validation output (observed and simulated) for the wheat cultivar Shatabdi using APSIM-Wheat model.
